# Supplementary material for: Galectin signatuares contribute to the heterogeneity of breast cancer and provide new prognostic information and therapeutic targets
Source: PubMed Central journal article supplement (PMC4951281; doi:10.18632/oncotarget.7784), 2016-02-27
Supplement: oncotarget-07-18183-s001.pdf [file oncotarget-07-18183-s001.pdf]

# Galectin signatures contribute to the heterogeneity of breast cancer and provide new prognostic information and therapeutic targets

## Supplementary Materials

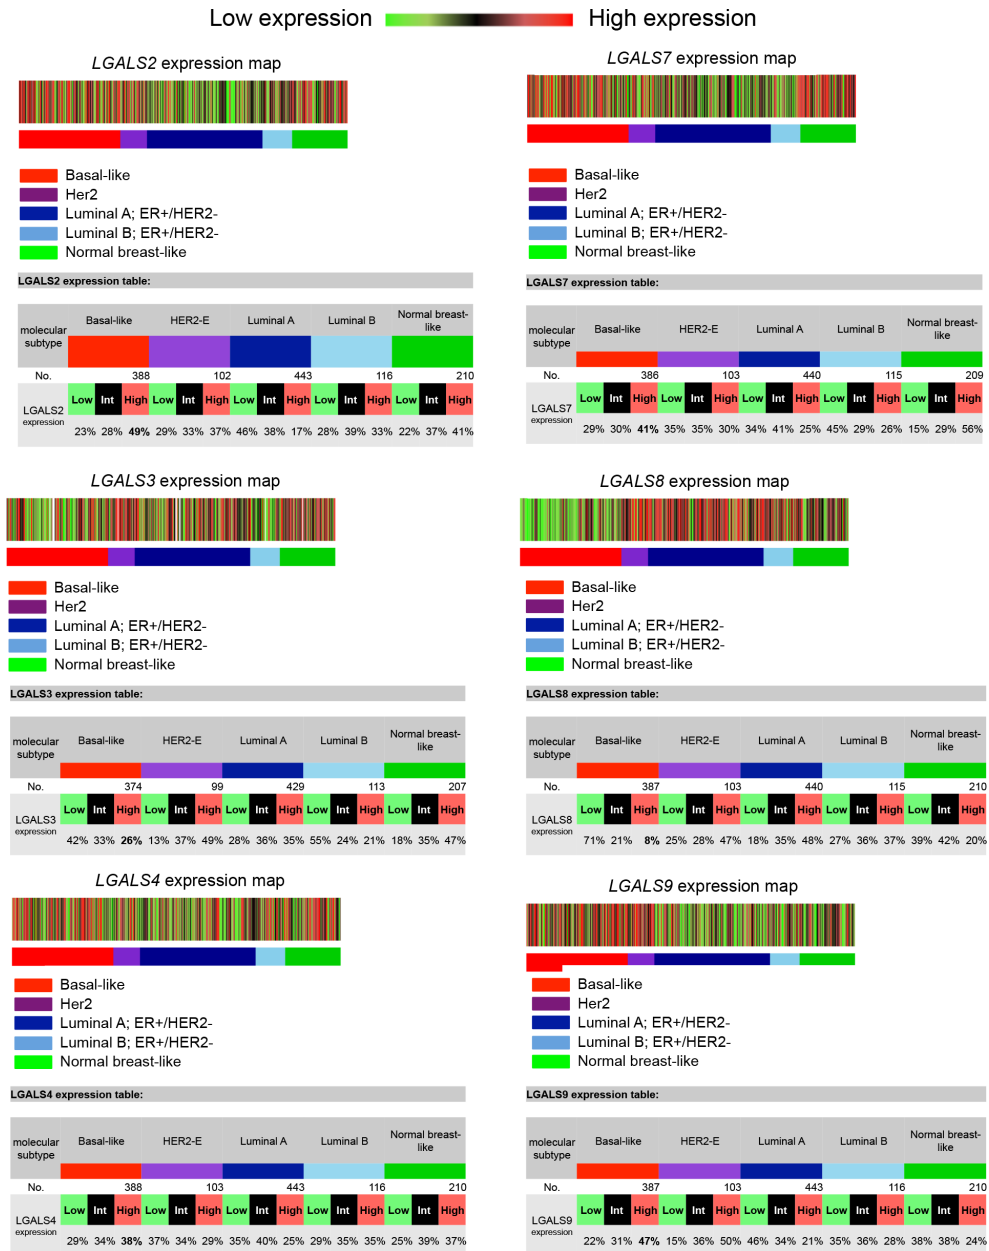

**Supplementary Figure S1: *In silico* analysis of galectins mRNA expression of human breast cancer (bc-GenExMiner).** Each map shows the percentage of patients with low, medium and high expression of *lgals2*, *3*, *4*, *7*, *8* and *9* mRNA in each molecular subtype: Basal-like (ER-, HER-2-), HER-2E (HER-2 enriched), Luminal A (ER+, HER-2-, low proliferation) and Luminal B (ER+, HER-2-, high proliferation).

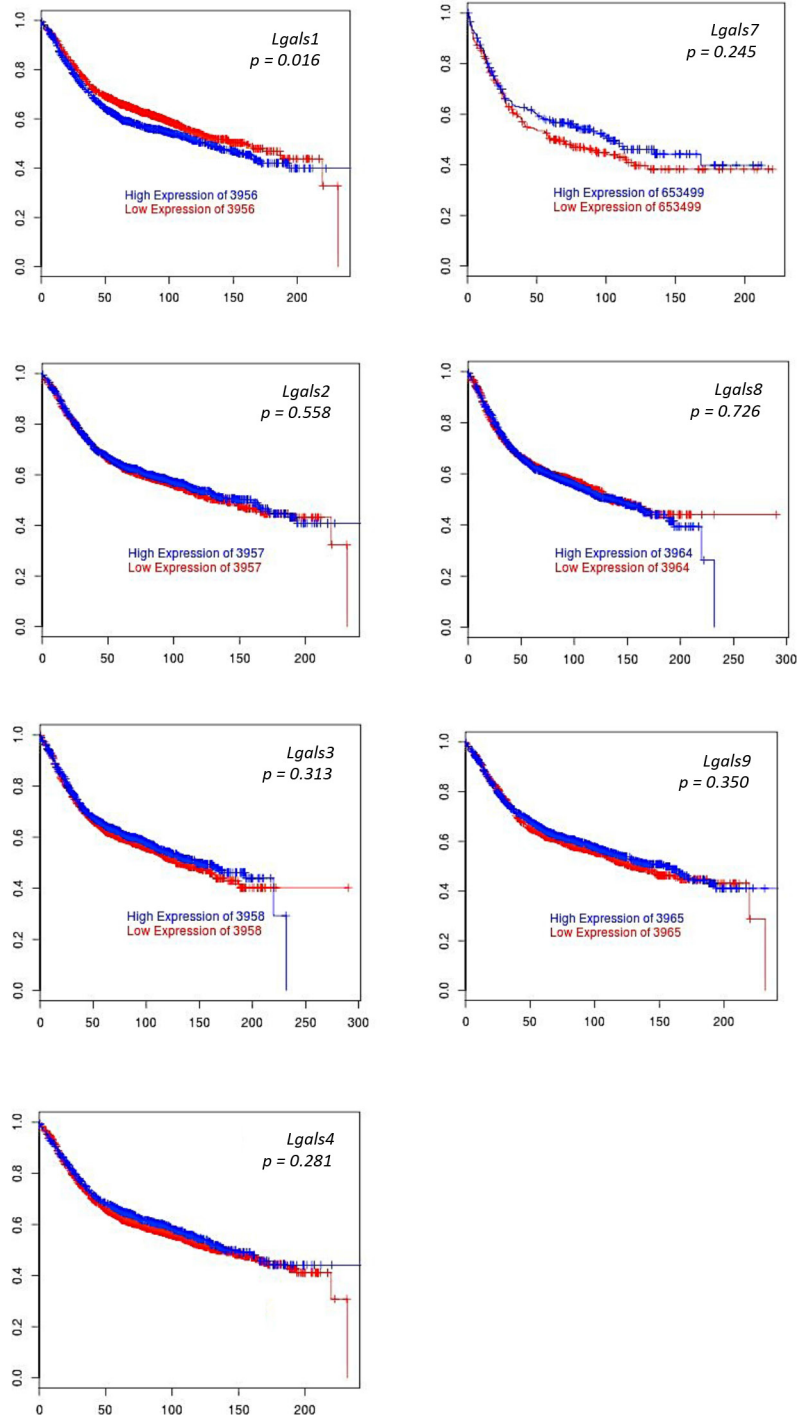

**Supplementary Figure S2: Effect of *galectin* gene expression on disease-free survival (DFS) of patients with breast cancer, independently of the LN status and across the molecular subtypes.** Kaplan-Meier estimates of overall survival in breast cancer patients expressing low or high *galectin* expression. These figures were generated using BreastMark public database.

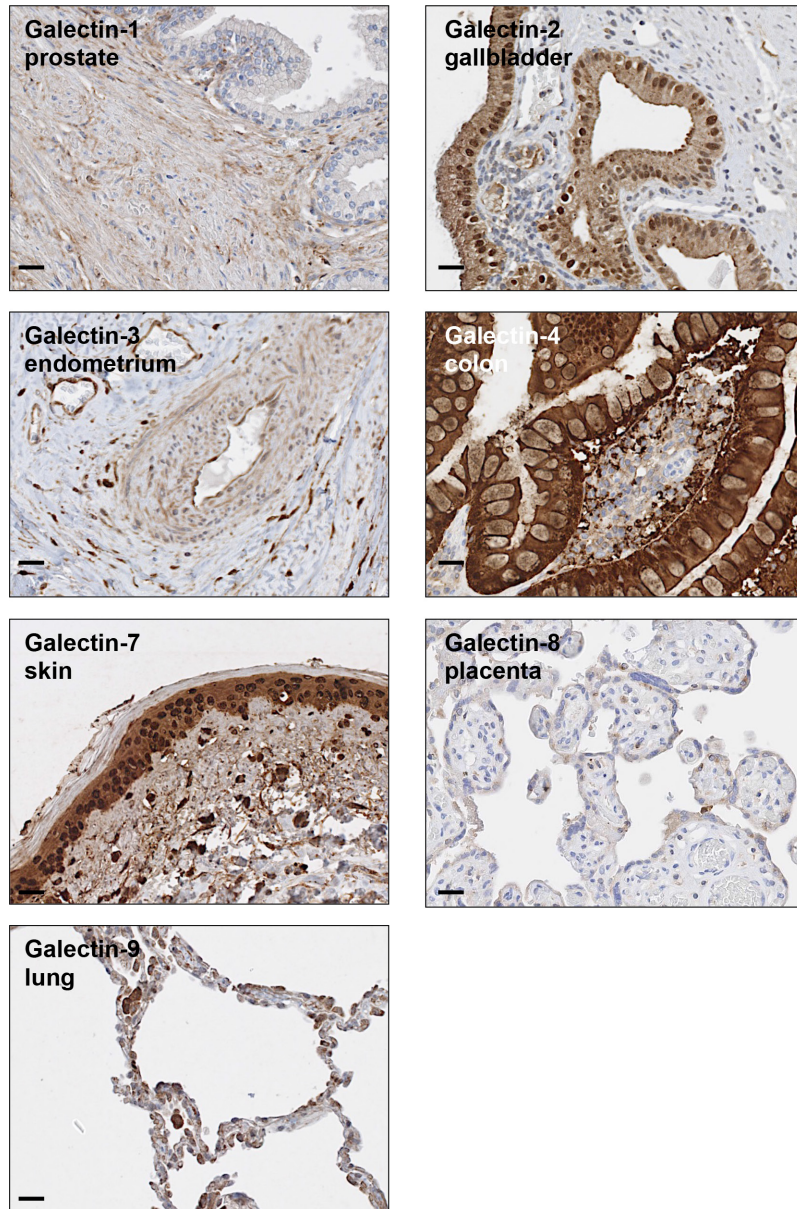

Supplementary Figure S3: Representative IHC staining showing positive controls of galectins expression in normal tissues.

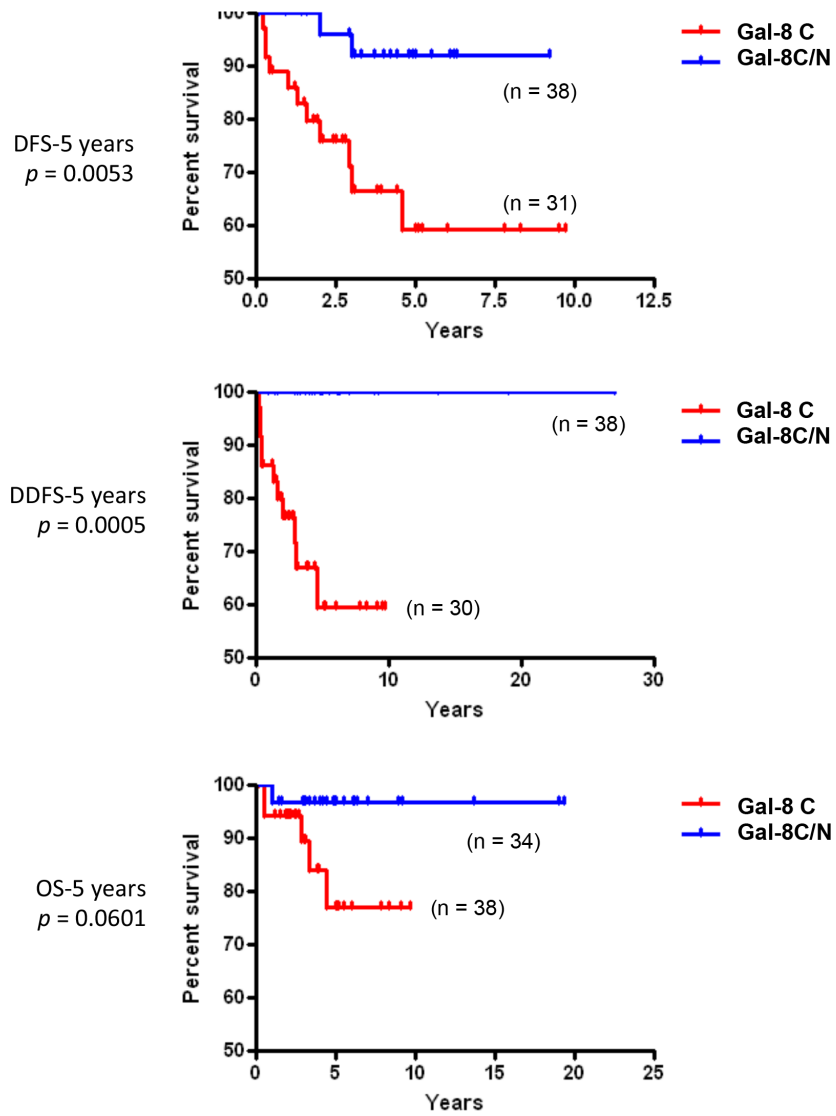

**Supplementary Figure S4: Prognostic potential of galectin in across molecular subtypes of breast cancer.** Kaplan-Meier estimates of 5-year DFS in breast cancer patients with low or high galectin expression independently of the molecular subtype.

## Lgals12

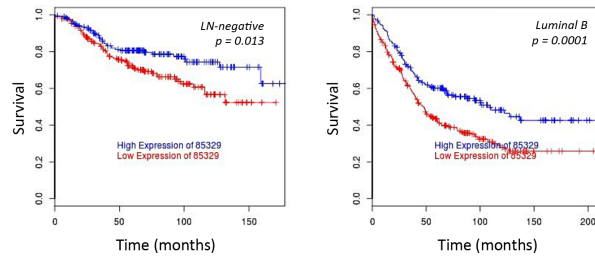

## Lgals13

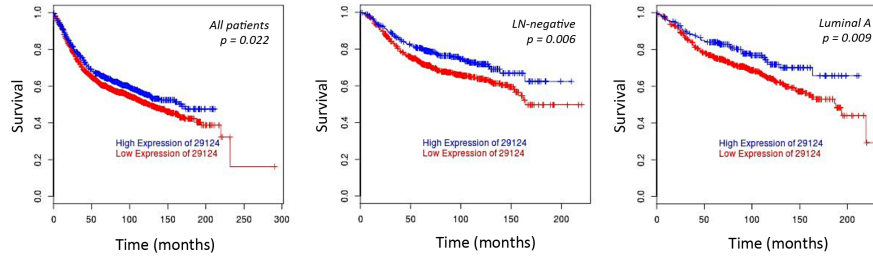

## Lgals14

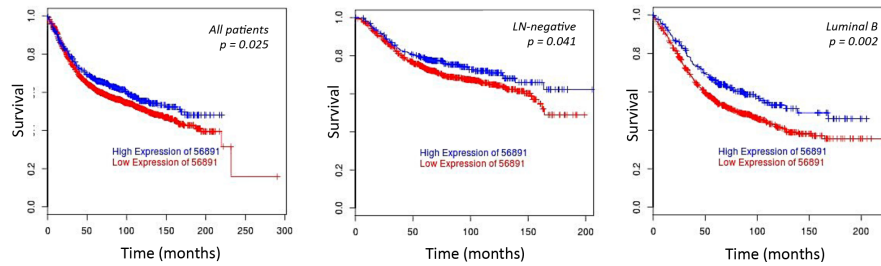

**Supplementary Figure S5: Prognostic potential of *galectin-12*, *-13* and *-14* genes in breast cancer.** Kaplan-Meier estimates of overall survival in breast cancer patients expressing low or high *galectin* expression. These figures were generated using BreastMark public database.

**Supplementary Table S1: Antibodies validation**

|       | Company           | Validation  | Reference                      |
|-------|-------------------|-------------|--------------------------------|
| Gal-1 | Novocastra        | Prostate    | Ellerhorst <i>et al</i> , 1999 |
| Gal-2 | Proteintech Group | Gallbladder | Saal <i>et al</i> , 2005       |
| Gal-3 | Abcam             | Endometrium | Brustmann <i>et al</i> , 2003  |
| Gal-4 | Santa Cruz        | Colon       | Huflejt <i>et al</i> , 2004    |
| Gal-7 | R & D Systems     | Skin        | Magnaldo <i>et al</i> , 1998   |
| Gal-8 | Abcam             | Placenta    | Kolundzic <i>et al</i> , 2011  |
| Gal-9 | Abcam             | Lung        | Matsumoto <i>et al</i> , 2013  |

**Supplementary Table S2: Histoclinical correlations of triple negative breast cancers according to galectins expression in cancer cells**

|                       | Gal-1 %(n)       |                | Gal-2 %(n)   |                | Gal-3 %(n)       |                | Gal-4 %(n)     |              | Gal-7 %(n) |         | Gal-8 %(n)     |                | Gal-9 %(n) |         |
|-----------------------|------------------|----------------|--------------|----------------|------------------|----------------|----------------|--------------|------------|---------|----------------|----------------|------------|---------|
|                       | Neg/ Low         | High           | Neg/ Low     | High           | Neg/ Low         | High           | Neg/ Low       | High         | Neg/ Low   | High    | Neg/ Low       | High           | Neg/ Low   | High    |
| Age, yr               | <b>P = 0.013</b> |                |              |                |                  |                |                |              |            |         |                |                |            |         |
| ≤ 45                  | 7 (5)            | 15 (11)        | 4 (3)        | 19 (14)        | 3 (2)            | 19 (14)        | <b>16 (12)</b> | <b>7 (5)</b> | 18 (13)    | 6 (4)   | 4 (3)          | 18 (13)        | 13 (9)     | 11 (8)  |
| > 45                  | 29 (21)          | 49 (36)        | 12 (9)       | 65 (48)        | 19 (14)          | 58 (42)        | <b>73 (54)</b> | <b>4 (3)</b> | 57 (41)    | 19 (14) | 25 (18)        | 53 (39)        | 42 (30)    | 35 (25) |
| Tumor volume          |                  |                |              |                |                  |                |                |              |            |         |                |                |            |         |
| ≤ 10 cm <sup>3</sup>  | 18(12)           | 30(20)         | 7(5)         | 38(26)         | 10 (7)           | 35 (24)        | 38 (26)        | 7 (5)        | 36 (24)    | 10 (7)  | 13 (9)         | 34 (23)        | 24 (16)    | 22 (15) |
| > 10 cm <sup>3</sup>  | 18(12)           | 34(23)         | 9(6)         | 46(31)         | 13 (9)           | 41 (28)        | 50 (34)        | 4 (3)        | 42 (28)    | 12 (8)  | 16 (11)        | 37 (25)        | 30 (20)    | 24 (16) |
| Lymph node metastasis |                  |                |              |                |                  |                |                |              |            |         |                |                |            |         |
| Negative              | 29 (21)          | 45 (33)        | 8 (6)        | 65 (48)        | 17 (12)          | 54 (39)        | 66 (49)        | 5 (4)        | 56 (40)    | 17 (12) | 18 (13)        | 53 (39)        | 36 (26)    | 35 (25) |
| Positive              | 7 (5)            | 19 (14)        | 8 (6)        | 19 (14)        | 6 (4)            | 24 (17)        | 23 (17)        | 5 (4)        | 19 (14)    | 8 (6)   | 11 (8)         | 18 (13)        | 18 (13)    | 11 (8)  |
| Recurrence            | <b>P = 0.021</b> |                |              |                | <b>P = 0.019</b> |                |                |              |            |         |                |                |            |         |
| No                    | <b>30 (21)</b>   | <b>32 (23)</b> | 7 (5)        | 53 (38)        | <b>19 (13)</b>   | <b>41 (29)</b> | 56 (40)        | 4 (3)        | 46 (32)    | 14 (10) | 14 (10)        | 45 (32)        | 34 (24)    | 26 (18) |
| Yes                   | <b>7 (5)</b>     | <b>31 (22)</b> | 8 (6)        | 32 (23)        | <b>3 (2)</b>     | <b>37 (26)</b> | 35 (25)        | 6 (4)        | 30 (21)    | 10 (7)  | 16 (11)        | 25 (18)        | 19 (13)    | 21 (15) |
| Distant metastasis    |                  |                |              |                |                  |                |                |              |            |         |                |                |            |         |
| No                    | 31 (22)          | 48 (34)        | 10 (7)       | 67 (48)        | 20 (14)          | 56 (39)        | 69 (50)        | 7 (5)        | 57 (40)    | 19 (13) | 24 (17)        | 52 (37)        | 40 (28)    | 36 (25) |
| Yes                   | 6 (4)            | 16 (11)        | 6 (4)        | 18 (13)        | 1 (1)            | 23 (16)        | 21 (15)        | 3 (2)        | 19 (13)    | 6 (4)   | 6 (4)          | 18 (13)        | 13 (9)     | 11 (8)  |
| Death                 | <b>P = 0.015</b> |                |              |                |                  |                |                |              |            |         |                |                |            |         |
| No                    | 34 (24)          | 51 (36)        | <b>8 (6)</b> | <b>75 (54)</b> | 19 (13)          | 64 (45)        | 74 (53)        | 10 (7)       | 63 (44)    | 20 (14) | 24 (17)        | 59 (42)        | 43 (30)    | 40 (28) |
| Yes                   | 3 (2)            | 13 (9)         | <b>7 (5)</b> | <b>10 (7)</b>  | 3 (2)            | 14 (10)        | 17 (12)        | 0 (0)        | 13 (9)     | 4 (3)   | 6 (4)          | 11 (8)         | 10 (7)     | 7 (5)   |
| Ki-67                 | <b>P = 0.009</b> |                |              |                |                  |                |                |              |            |         |                |                |            |         |
| Neg/ Low              | 8 (6)            | 21 (15)        | 5 (4)        | 23 (17)        | 6 (4)            | 24 (17)        | 24 (18)        | 4 (3)        | 21 (15)    | 8 (6)   | <b>15 (11)</b> | <b>14 (10)</b> | 21 (15)    | 8 (6)   |
| High                  | 27 (20)          | 44 (32)        | 11 (8)       | 61 (45)        | 17 (12)          | 54 (39)        | 65 (48)        | 7 (5)        | 54 (39)    | 17 (12) | <b>14 (10)</b> | <b>58 (42)</b> | 33 (24)    | 38 (27) |

Fisher's exact test and chi-square test.
